**Supplementary Material to:**

**Have wind turbines in Germany generated electricity as would be expected from the prevailing wind conditions in 2000-2014?**

Sonja Germer, Axel Kleidon

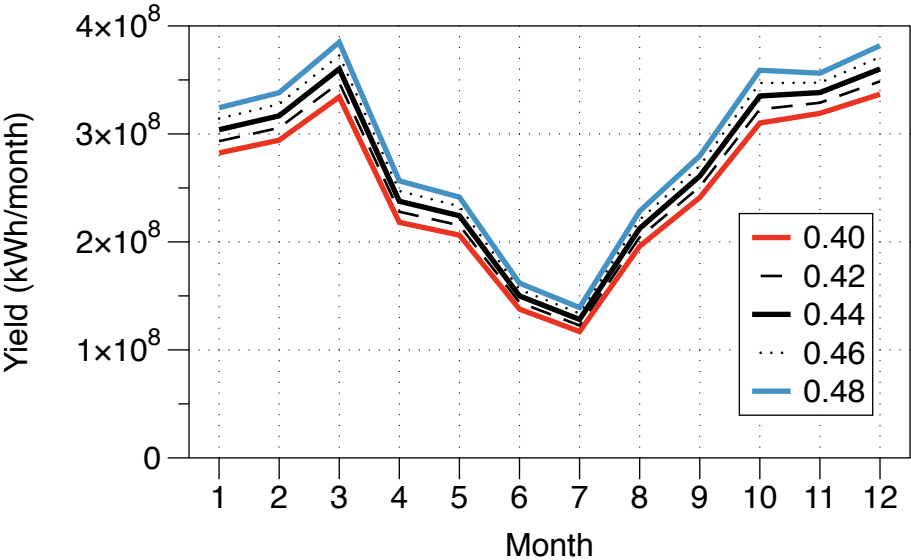

**S4 Fig. Sensitivity of estimated monthly yield to the power coefficient for the year 2010.**
