**Supporting Information to:**

**Have wind turbines in Germany generated electricity as would be expected from the prevailing wind conditions in 2000-2014?**

Sonja Germer, Axel Kleidon

**S4 Table. Values of specific power (kW/m<sup>2</sup>) distribution shown in Figure 3d.**

| Year | Mean | 5 <sup>th</sup> percentile | 25 <sup>th</sup> percentile | Median | 75 <sup>th</sup> percentile | 95 <sup>th</sup> percentile |
|------|------|----------------------------|-----------------------------|--------|-----------------------------|-----------------------------|
| 2000 | 0,39 | 0,28                       | 0,36                        | 0,39   | 0,41                        | 0,47                        |
| 2001 | 0,39 | 0,29                       | 0,36                        | 0,39   | 0,42                        | 0,47                        |
| 2002 | 0,39 | 0,31                       | 0,37                        | 0,39   | 0,43                        | 0,47                        |
| 2003 | 0,39 | 0,31                       | 0,37                        | 0,39   | 0,43                        | 0,47                        |
| 2004 | 0,40 | 0,31                       | 0,37                        | 0,39   | 0,43                        | 0,47                        |
| 2005 | 0,40 | 0,31                       | 0,36                        | 0,39   | 0,43                        | 0,48                        |
| 2006 | 0,40 | 0,31                       | 0,36                        | 0,39   | 0,44                        | 0,48                        |
| 2007 | 0,40 | 0,31                       | 0,36                        | 0,39   | 0,44                        | 0,51                        |
| 2008 | 0,40 | 0,31                       | 0,36                        | 0,39   | 0,44                        | 0,51                        |
| 2009 | 0,40 | 0,31                       | 0,35                        | 0,39   | 0,44                        | 0,51                        |
| 2010 | 0,40 | 0,31                       | 0,35                        | 0,39   | 0,44                        | 0,51                        |
| 2011 | 0,40 | 0,31                       | 0,35                        | 0,39   | 0,44                        | 0,51                        |
| 2012 | 0,40 | 0,31                       | 0,35                        | 0,39   | 0,44                        | 0,51                        |
| 2013 | 0,40 | 0,31                       | 0,35                        | 0,39   | 0,44                        | 0,51                        |
| 2014 | 0,40 | 0,30                       | 0,35                        | 0,39   | 0,44                        | 0,51                        |
