**Supporting Information to:**

**Have wind turbines in Germany generated electricity as would be expected from the prevailing wind conditions in 2000-2014?**

Sonja Germer, Axel Kleidon

**S5 Table. Values of park size (N) distribution shown in Figure 3e.**

| Year | Mean | 5 <sup>th</sup> percentile | 25 <sup>th</sup> percentile | Median | 75 <sup>th</sup> percentile | 95 <sup>th</sup> percentile |
|------|------|----------------------------|-----------------------------|--------|-----------------------------|-----------------------------|
| 2000 | 2,44 | 1                          | 1                           | 1      | 2                           | 8                           |
| 2001 | 2,60 | 1                          | 1                           | 1      | 3                           | 9                           |
| 2002 | 2,72 | 1                          | 1                           | 1      | 3                           | 9                           |
| 2003 | 2,78 | 1                          | 1                           | 1      | 3                           | 10                          |
| 2004 | 2,83 | 1                          | 1                           | 1      | 3                           | 10                          |
| 2005 | 2,89 | 1                          | 1                           | 1      | 3                           | 10                          |
| 2006 | 2,94 | 1                          | 1                           | 1      | 3                           | 10                          |
| 2007 | 2,97 | 1                          | 1                           | 1      | 3                           | 10                          |
| 2008 | 3,01 | 1                          | 1                           | 2      | 3                           | 10                          |
| 2009 | 3,04 | 1                          | 1                           | 2      | 3                           | 10                          |
| 2010 | 3,04 | 1                          | 1                           | 2      | 3                           | 10                          |
| 2011 | 3,05 | 1                          | 1                           | 2      | 3                           | 10                          |
| 2012 | 3,08 | 1                          | 1                           | 2      | 3                           | 10                          |
| 2013 | 3,10 | 1                          | 1                           | 2      | 4                           | 10                          |
| 2014 | 3,13 | 1                          | 1                           | 2      | 4                           | 10                          |
