**Supporting Information to:**

**Have wind turbines in Germany generated electricity as would be expected from the prevailing wind conditions in 2000-2014?**

Sonja Germer, Axel Kleidon

**S6 Table. Values of installed capacity (kW/km<sup>2</sup>) distribution shown in Figure 3f.**

| Year | Mean   | 5 <sup>th</sup> percentile | 25 <sup>th</sup> percentile | Median | 75 <sup>th</sup> percentile | 95 <sup>th</sup> percentile |
|------|--------|----------------------------|-----------------------------|--------|-----------------------------|-----------------------------|
| 2000 | 72,79  | 1,12                       | 6,02                        | 21,15  | 67,25                       | 294,60                      |
| 2001 | 91,10  | 1,36                       | 8,61                        | 30,83  | 87,60                       | 371,58                      |
| 2002 | 115,73 | 1,83                       | 13,79                       | 45,98  | 117,94                      | 449,26                      |
| 2003 | 135,61 | 2,17                       | 16,92                       | 55,91  | 141,28                      | 513,62                      |
| 2004 | 146,53 | 2,41                       | 19,67                       | 64,34  | 156,82                      | 542,14                      |
| 2005 | 158,63 | 2,67                       | 21,55                       | 69,19  | 175,05                      | 563,42                      |
| 2006 | 172,19 | 2,71                       | 24,65                       | 75,35  | 192,76                      | 611,36                      |
| 2007 | 182,71 | 2,78                       | 27,16                       | 80,89  | 201,88                      | 653,20                      |
| 2008 | 192,79 | 2,94                       | 29,20                       | 85,99  | 212,94                      | 698,15                      |
| 2009 | 202,26 | 2,97                       | 30,67                       | 91,88  | 222,78                      | 716,69                      |
| 2010 | 212,96 | 3,01                       | 33,19                       | 95,12  | 231,07                      | 766,32                      |
| 2011 | 221,97 | 3,08                       | 35,54                       | 99,82  | 246,63                      | 806,77                      |
| 2012 | 235,55 | 3,18                       | 37,40                       | 107,69 | 260,82                      | 844,98                      |
| 2013 | 252,23 | 3,44                       | 39,64                       | 116,82 | 277,33                      | 878,70                      |
| 2014 | 280,67 | 3,72                       | 45,74                       | 133,41 | 309,47                      | 1006,74                     |
