# Supplementary material for: Have wind turbines in Germany generated electricity as would be expected from the prevailing wind conditions in 2000-2014?
Source: PLoS One. 2019 Feb 6;14(2):e0211028. doi: 10.1371/journal.pone.0211028 (PMC6364903; doi:10.1371/journal.pone.0211028)
Supplement: S1 Fig — The median (solid line), mean (dotted line) and the interquartile range (blue area) for the histogram of the entire period are also shown. (PDF) [file pone.0211028.s001.pdf]

**Supplementary Material to:**

**Have wind turbines in Germany generated electricity as would be expected from the prevailing wind conditions in 2000-2014?**

Sonja Germer, Axel Kleidon

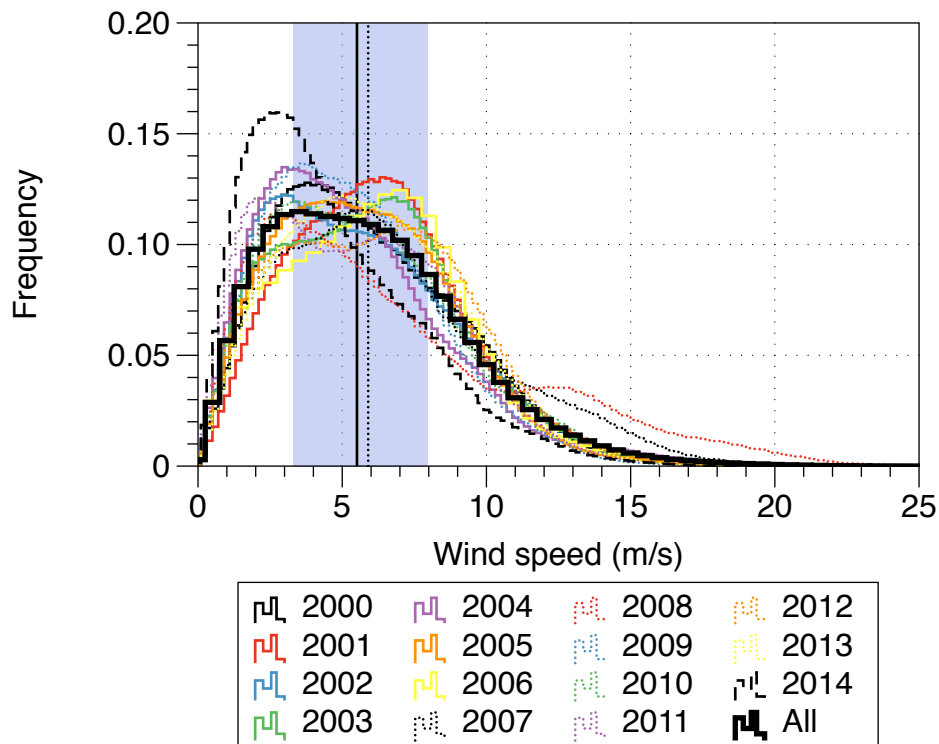

**S1 Fig. Frequency histograms of hourly wind speeds in Germany for the years 2000 to 2014 (“All”) and for single years within is period extracted from the COSMO-REA6 dataset at 100 m height. The median (solid line), mean (dotted line) and the interquartile range (blue area) for the histogram of the entire period are also shown.**
